# Supplementary material for: Photodeposited nickel-loaded ZnCdS nanoparticles for hydrogen production from photocatalytic water splitting
Source: Royal Society of Chemistry journal article supplement (doi:10.1039/d4nj00293h), 2024-01-01
Supplement: d4nj00293h1.pdf [file d4nj00293h1.pdf]

## Supporting Information

### **Photodeposited Nickel loaded ZnCdS nanoparticles for photocatalytic water splitting to hydrogen production**

Xiaorun Huang, Changyan Guo\*, Yanan Niu, Yanqiu Ma, Jide Wang\*

Key Laboratory of Oil and Gas Fine Chemicals, Ministry of Education & Xinjiang  
Uygur Autonomous Region, School of Chemical Engineering and Technology,  
Xinjiang University, Urumqi, 830046, China.

E-mail addresses: gcysl@xju.edu.cn (C. Guo), awangjd@sina.cn (J. Wang).

# Content

|                                                                                                                                                 |   |
|-------------------------------------------------------------------------------------------------------------------------------------------------|---|
| 1 Experimental section.....                                                                                                                     | 1 |
| 1.1 Characterization .....                                                                                                                      | 1 |
| 1.2 Photocatalytic H <sub>2</sub> production .....                                                                                              | 1 |
| 1.3 Electrochemical testing .....                                                                                                               | 1 |
| Fig. S1 SEM images of CdS-cube (a), CdS/Ni-cube (b), ZnCdS(TS) (c), ZnCdS(TS)/Ni-0.5H (d) and ZnCdS(OS) (e) and ZnCdS(OS)/Ni (f). .....         | 3 |
| Fig. S2 TGA text of different catalysts. ....                                                                                                   | 4 |
| Fig. S3 XRD pattern of ZnCdS(TS)/Ni-1H after cycle experiment. ....                                                                             | 4 |
| Fig. S4 The recyclability study of ZnCdS(TS)/Ni-1H.....                                                                                         | 5 |
| Fig. S5 Free radical capture experiment. ....                                                                                                   | 5 |
| Fig. S6 Mott-Schottky plots of CdS-cube (a), CdS/Ni-cube (b), ZnCdS(TS) (c), ZnCdS(TS)/Ni-0.5H (d), ZnCdS(OS)/Ni (e) and ZbCdS(OS)/Ni (f). .... | 6 |
| Table S1 Comparison of photocatalytic hydrogen production performance with other catalysts.....                                                 | 7 |
| References.....                                                                                                                                 | 8 |

## **1 Experimental section**

### **1.1 Characterization**

The crystal structures of the samples were analyzed by a Rigaku D/max-ga X-ray diffractometer (XRD) with a scan rate of  $6^\circ \text{ min}^{-1}$  and a  $2\theta$  range of  $10^\circ$  to  $80^\circ$  using Cu K $\alpha$  radiation ( $\lambda = 1.54178 \text{ \AA}$ ). X-ray photoelectron spectroscopy (XPS) measurements were performed on a Thermo Fisher Scientific XPS ESCALAB 250 Xi instrument which uses an Al K $\alpha$  (1486.8 eV) X-ray source to determine the valence states of all elements. Field emission scanning electron microscopy (FESEM) was performed by a Hitachi SU8010 at an accelerating voltage of 5 kV in order to observe the morphology of the prepared samples. High resolution transmission electron microscopy (HRTEM) analysis was performed on a Hitachi 600TEM at an acceleration voltage of 200 kV to analyze the microstructure of the samples. UV-Vis measurements were performed on a Unico UV-4802S with barium sulfate as a reference.

### **1.2 Photocatalytic H<sub>2</sub> production**

Photocatalyst (10mg) was added into a 20 mL photoreactor with circulating water. At the same time, 10 mL of Na<sub>2</sub>S (0.1 mol/L) and Na<sub>2</sub>SO<sub>3</sub> (0.1 mol/L) solution was added into the bottle and sealed. The air inside the bottle was replaced with argon for 10 min, and place under a xenon lamp with magnetic stirring. The light source was a 300 W xenon lamp with cutoff wavelength  $>420$  nm. 100  $\mu\text{L}$  of gas in the bottle was taken every hour to measure hydrogen by gas chromatography. Gas chromatography (Japan Shimadzu Corporation GC-14B) used a thermal conductivity detector (TCD) with a column of 5  $\text{\AA}$  molecular sieves (4 mm  $\times$  2 m). Argon was used as the carrier gas.

### **1.3 Electrochemical testing**

All the electrochemical measurements were performed on a CHI660D electrochemical workstation (Shanghai Chenhua Instrument, Ltd. Shanghai, China) with standard three electrode system. The following methods was used to prepare working electrodes: 5 mg sample was put into a sample tube, and 980  $\mu\text{L}$  of absolute ethanol and 20  $\mu\text{L}$  of Nafion solution were added. The samples were dispersed by ultrasonic for 30 min and then dropped on the prepared  $1 \times 1 \text{ cm}^2$  FTO

(fluorine-doped tin oxide) glass. Mott-Schottky analysis was performed at potentials from -1 to 1 V. All tests were performed with Hg/Hg<sub>2</sub>Cl<sub>2</sub> (saturated KCl) electrode as reference electrode, platinum sheet as counter electrode and 0.5 mol·L<sup>-1</sup> Na<sub>2</sub>SO<sub>4</sub> as electrolytes at room temperature.

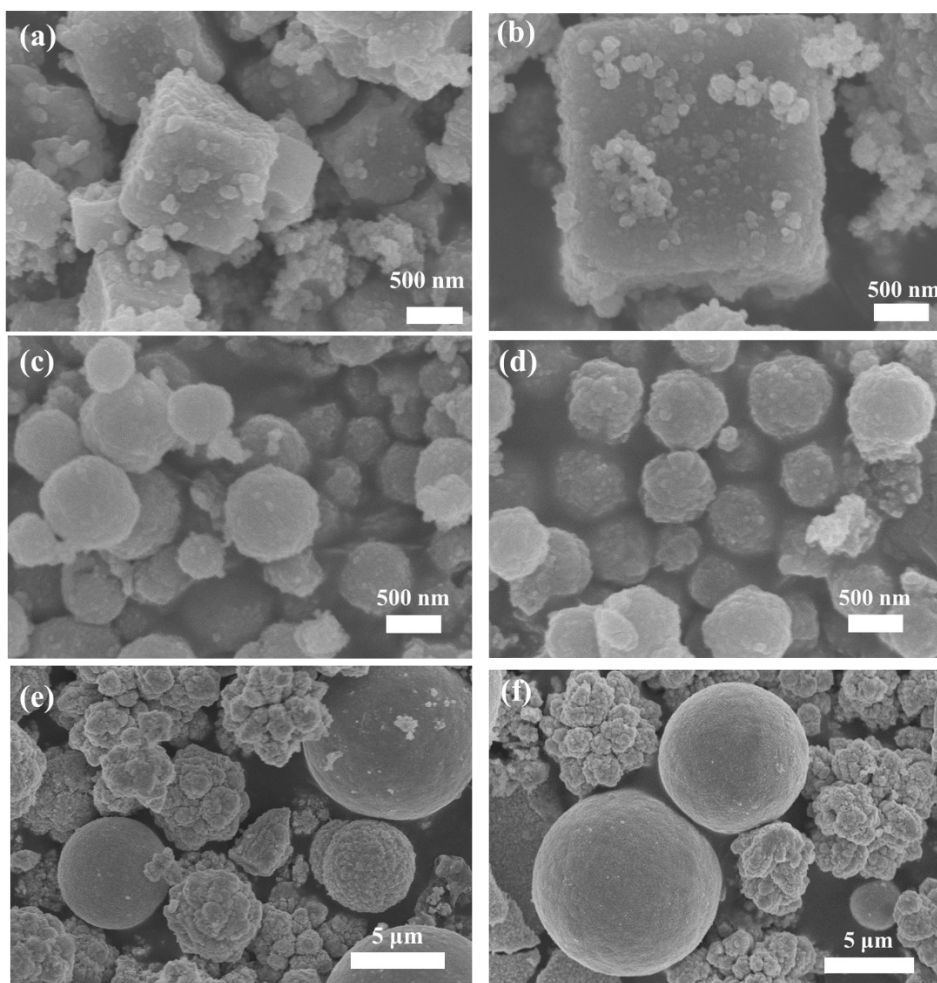

**Fig. S1** SEM images of CdS-cube (a), CdS/Ni-cube (b), ZnCdS(TS) (c), ZnCdS(TS)/Ni-0.5H (d) and ZnCdS(OS) (e) and ZnCdS(OS)/Ni (f).

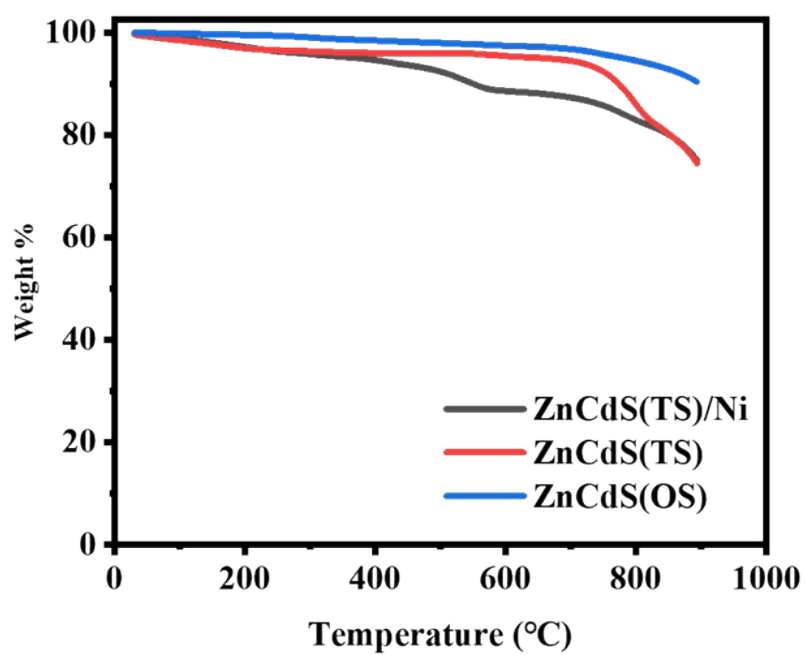

Fig. S2 TGA text of different catalysts.

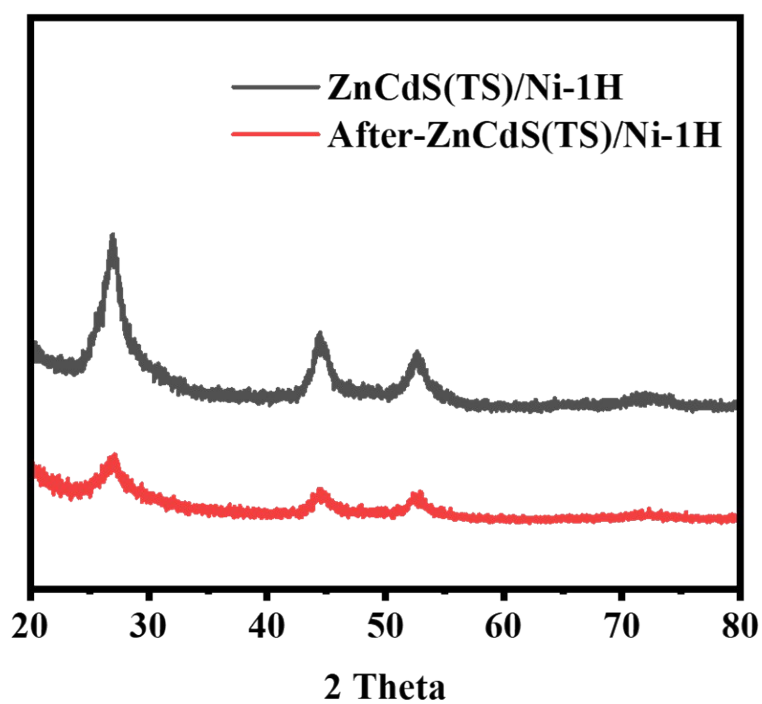

Fig. S3 XRD pattern of ZnCdS(TS)/Ni-1H after cycle experiment.

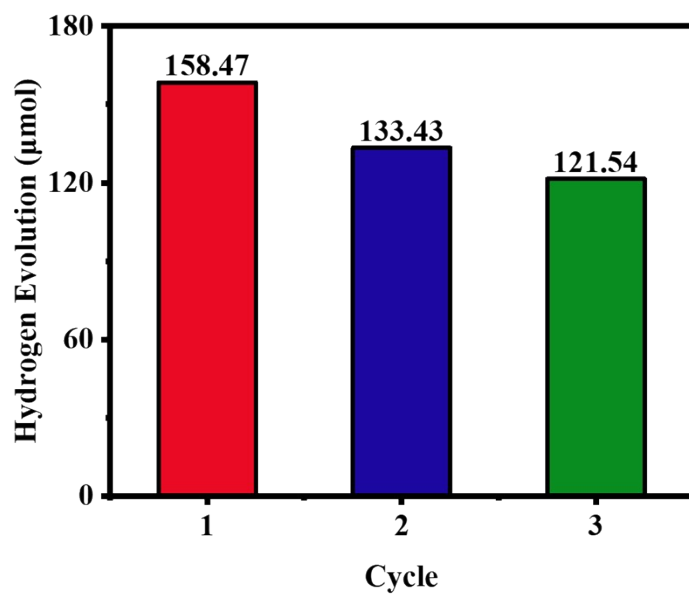

Fig. S4 The recyclability study of ZnCdS(TS)/Ni-1H

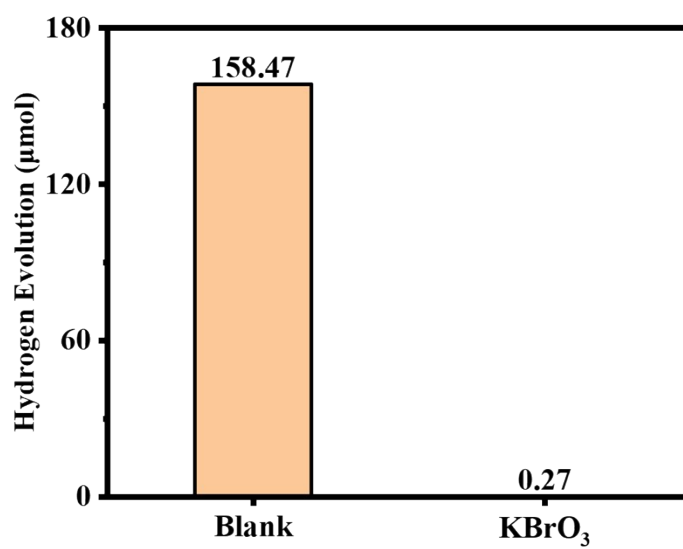

Fig. S5 Free radical capture experiment.

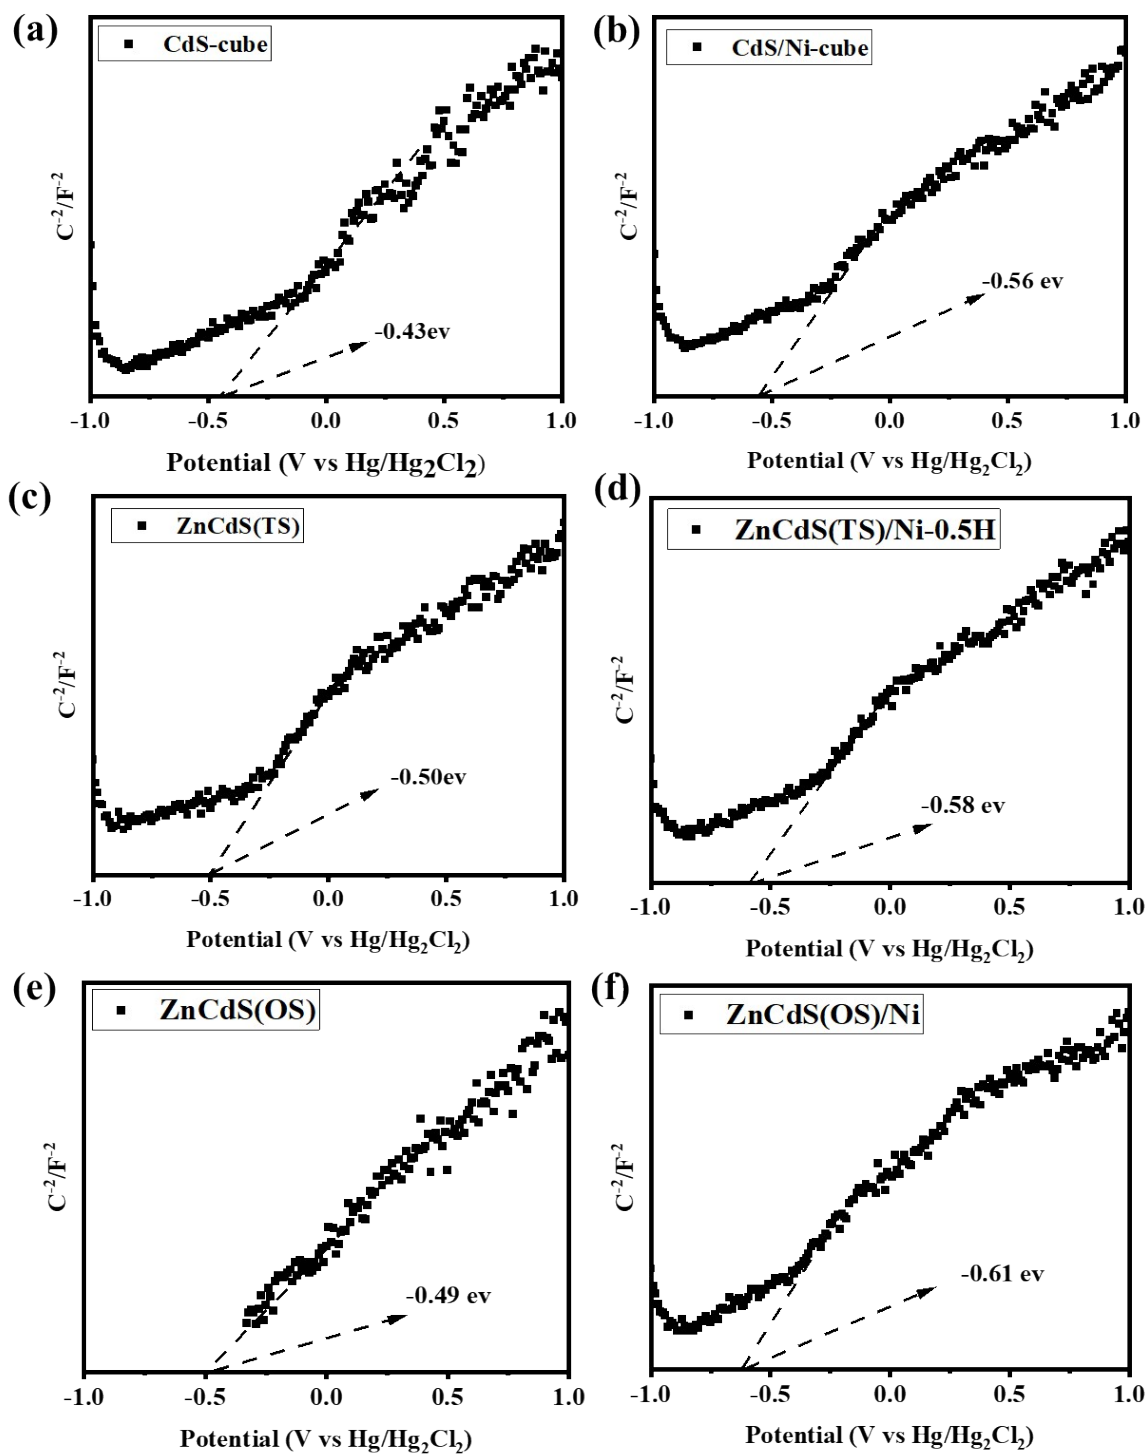

**Fig. S6** Mott-Schottky plots of CdS-cube (a), CdS/Ni-cube (b), ZnCdS(TS) (c), ZnCdS(TS)/Ni-0.5H (d), ZnCdS(OS)/Ni (e) and ZnCdS(OS)/Ni (f).



**Table S1 Comparison of photocatalytic hydrogen production performance with other catalysts**

| Photocatalysts                                                                         | Cocatalyst                                       | Reactant solution<br>(Sacrificial Agent)                                          | Light<br>source                                     | HER<br>activity                                                  | Refs.        |
|----------------------------------------------------------------------------------------|--------------------------------------------------|-----------------------------------------------------------------------------------|-----------------------------------------------------|------------------------------------------------------------------|--------------|
| ZnCdS/Ni                                                                               |                                                  | 0.1 M Na <sub>2</sub> SO <sub>3</sub> and<br>0.1 M Na <sub>2</sub> S              | 300 W Xenon<br>lamp with 420 nm<br>cutoff filter    | 2641<br>$\mu\text{mol}\cdot\text{g}^{-1}\cdot\text{h}^{-1}$      | This<br>work |
| NiO <sub>x</sub> /B-<br>TiO <sub>2</sub> @CdS                                          |                                                  | 0.1 M Na <sub>2</sub> SO <sub>3</sub> and<br>0.1 M Na <sub>2</sub> S              | 300 W Xenon<br>lamp with standard<br>AM 1.5G filter | 3.04<br>$\text{mmol}\cdot\text{g}^{-1}\cdot\text{h}^{-1}$        | [1]          |
| TiO <sub>2</sub>                                                                       | NiO                                              | 20 vol% Methanol                                                                  | 300 W Xenon<br>lamp with standard<br>AM 1.5G filter | 228<br>$\mu\text{mol}\cdot\text{g}^{-1}\cdot\text{h}^{-1}$       | [2]          |
| ZnWO <sub>4</sub> /CuO/T<br>CPP                                                        |                                                  | 40 mL H <sub>2</sub> O + 20<br>mL TEOA                                            | 500 W Mercury<br>lamp                               | 1.84<br>$\text{mmol}\cdot\text{g}^{-1}\cdot\text{h}^{-1}$        | [3]          |
| g-C <sub>3</sub> N <sub>4</sub>                                                        | 5 % wt<br>Nb <sub>2</sub> O <sub>5</sub>         | 10 vol% aq. TEOA                                                                  | 300 W Xenon<br>lamp with 420 nm<br>cutoff filter    | 2.07 ± 0.03<br>$\text{mmol}\cdot\text{g}^{-1}\cdot\text{h}^{-1}$ | [4]          |
| Co <sub>3</sub> O <sub>4</sub> /gC <sub>3</sub> N <sub>4</sub> /C<br>oTiO <sub>3</sub> |                                                  | 15 vol% aq. TEOA                                                                  | 5 W LED Lamp                                        | 1971.7<br>$\mu\text{mol}\cdot\text{g}^{-1}\cdot\text{h}^{-1}$    | [5]          |
| Hollow<br>OvCeO <sub>2</sub> /CdS<br>nanocage cubes                                    |                                                  | 0.75 mol/L Na <sub>2</sub> S<br>and 1.05 mol/L<br>Na <sub>2</sub> SO <sub>3</sub> | 300 W Xenon<br>lamp with 420 nm<br>cutoff filter    | ~12.6<br>$\text{mmol}\cdot\text{g}^{-1}\cdot\text{h}^{-1}$       | [6]          |
| ZnP-Pz-PEO-<br>COF                                                                     | [Mo <sub>3</sub> S <sub>13</sub> ] <sup>2-</sup> | 50 mM Ascorbic<br>Acid and 15 vol%<br>Lactic Acid                                 | 300 W Xenon<br>lamp with 420 nm<br>cutoff filter    | 1.38<br>$\text{mmol}\cdot\text{g}^{-1}\cdot\text{h}^{-1}$        | [7]          |
| Ag-AgMOM                                                                               |                                                  | TEOA                                                                              | 300 W Xenon<br>lamp without any<br>cutoff filter    | 3153<br>$\mu\text{mol}\cdot\text{g}^{-1}\cdot\text{h}^{-1}$      | [8]          |
| Ag/CN                                                                                  | 1% wt.<br>Pt                                     | 20 vol% aq. TEOA                                                                  | 300 W Xenon<br>lamp with 400<br>nm cutoff filter    | 1688.9<br>$\text{mmol}\cdot\text{g}^{-1}\cdot\text{h}^{-1}$      | [9]          |

## References

- [1] Wu P, Ma Y, Yang X, Peng X, Liu C, Li B, et al. Bulk and surface dual-defects NiO<sub>x</sub>/B-TiO<sub>2</sub>@CdS photocatalyst for stable and effective photocatalytic hydrogen evolution. *J Mater Sci* 2022; 57:14450–63.
- [2] Yu C, Li M, Yang D, Pan K, Yang F, Xu Y, et al. NiO nanoparticles dotted TiO<sub>2</sub> nanosheets assembled nanotubes P-N heterojunctions for efficient interface charge separation and photocatalytic hydrogen evolution. *Appl Surf Sci* 2021; 568:150981.
- [3] Zheng D, Sun Z, Zhao H, Liu R, Wang X, Hu J, et al. Porphyrin sensitized ZnWO<sub>4</sub> nanosheets with CuO nanoparticles for photocatalytic hydrogen evolution. *J Phys Chem Solids* 2024; 184:111727.
- [4] Dong Q, Chen Z, Zhao B, Zhang Y, Lu Z, Wang X, et al. In situ fabrication of niobium pentoxide/graphitic carbon nitride type-II heterojunctions for enhanced photocatalytic hydrogen evolution reaction. *J Colloid Interface Sci* 2022; 608:1951–9.
- [5] Yang K, Zhang H, Liu T, Xiang D, Li Y, Jin Z. Tailoring of efficient electronextracting system: S-scheme g-C<sub>3</sub>N<sub>4</sub>/CoTiO<sub>3</sub> heterojunction modified with Co<sub>3</sub>O<sub>4</sub> quantum dots for photocatalytic hydrogen evolution. *J Electroanal Chem* 2022;922: 116749.
- [6] Wei Y, Xue C, Jin L, Zhang J, Zhao Z, Feng L, et al. Defect-induced atomic-level intimate interface of a hollow Ov-CeO<sub>2</sub>/CdS photocatalyst with a Z-scheme to boost hydrogen evolution. *J Colloid Interface Sci* 2023; 646:209–18.
- [7] Yin L, Zhao Y, Xing Y, Tan H, Lang Z, Ho W, et al. Structure-Property relationship in β-keto-enamine-based covalent organic frameworks for highly efficient photocatalytic hydrogen production. *Chem Eng J* 2021; 419:129984.
- [8] Liu Y, Liu C-H, Debnath T, Wang Y, Pohl D, Besteiro LV, et al. Silver nanoparticle enhanced metal-organic matrix with interface-engineering for efficient photocatalytic hydrogen evolution. *Nat Commun* 2023; 14:541.
- [9] Yan B, Song H, Yang G. A facile and green large-scale fabrication of single atom catalysts for high photocatalytic H<sub>2</sub> evolution activity. *Chem Eng J* 2022; 427:131795.
